# Supplementary material
Source: publisher figshare collection journal article supplement (https://karger.figshare.com/ndownloader/files/10912718)
Supplement: Supplementary file 1 [file 10912718]

## **Supplementary materials**

### **Supplementary Fig. 1**

The TCGA data (<https://cancergenome.nih.gov/>) were processed to evaluate the expression of lncRNA SAP30L-AS1 and SChLAP1 in 499 PCa patients and 52 adjacent non-cancer tissues. (A). and (B). SAP30L-AS1 and SChLAP1 levels in the tumor tissues were significantly higher than these levels in the non-tumor tissues.

### **Supplementary Fig. 2**

Receiver operating characteristic (ROC) curves of BPH. (A). and (B). The diagnostic value of SChLAP1 is better than SAP30L-AS1 to differentiate BPH patients from the controls. (C). The area of the combination of two lncRNA was equal to 0.935; (D). and (E). Two lncRNA separately combined with PSA possessed a moderate ability for discrimination. (F). The AUC of two lncRNAs combined with PSA was 0.986.

## Supplementary Table1

### The basic information of PCa patients, BPH patients and healthy controls.

|                       | 30 healthy controls | 46 Benign Prostatic Hyperplasia |          | 34 Prostate Cancer |          |
|-----------------------|---------------------|---------------------------------|----------|--------------------|----------|
|                       | Median (range)      | Median (range)                  | P value  | Median (range)     | P value  |
| Age(year)             | 69 (62-81)          | 70 (53-89)                      | 0.535    | 73 (56-86)         | 0.064    |
| PSA(ng/mL)            |                     |                                 |          |                    |          |
| Total                 | 1.44 (0.37-3.66)    | 6.66 (0.29-30.8)                | < 0.0001 | 68 (0.20-268)      | < 0.0001 |
| ≤10                   | 30                  | 37                              | < 0.0001 | 13                 | < 0.0001 |
| >10                   | -                   | 9                               | -        | 21                 | -        |
| Unknown               | -                   | -                               | -        | -                  | -        |
| Gleason sum           |                     |                                 |          |                    |          |
| <7                    | -                   | -                               | -        | 5                  | -        |
| 7                     | -                   | -                               | -        | 12                 | -        |
| 3+4                   | -                   | -                               | -        | 7                  | -        |
| 4+3                   | -                   | -                               | -        | 5                  | -        |
| >7                    | -                   | -                               | -        | 13                 | -        |
| Unknown               | -                   | -                               | -        | 4                  | -        |
| pT-stage              |                     |                                 |          |                    |          |
| T2                    | -                   | -                               | -        | 11                 | -        |
| T3a                   | -                   | -                               | -        | 2                  | -        |
| T3b                   | -                   | -                               | -        | 6                  | -        |
| T4                    | -                   | -                               | -        | 6                  | -        |
| Unknown               | -                   | -                               | -        | 9                  | -        |
| Lymph node metastasis |                     |                                 |          |                    |          |
| Yes                   | -                   | -                               | -        | 9                  | -        |
| No                    | -                   | -                               | -        | 17                 | -        |
| Unknown               | -                   | -                               | -        | 8                  | -        |
| Development           |                     |                                 |          |                    |          |

of metastasis

|         |   |   |   |    |   |
|---------|---|---|---|----|---|
| Yes     | - | - | - | 14 | - |
| No      | - | - | - | 12 | - |
| Unknown | - | - | - | 8  | - |

---

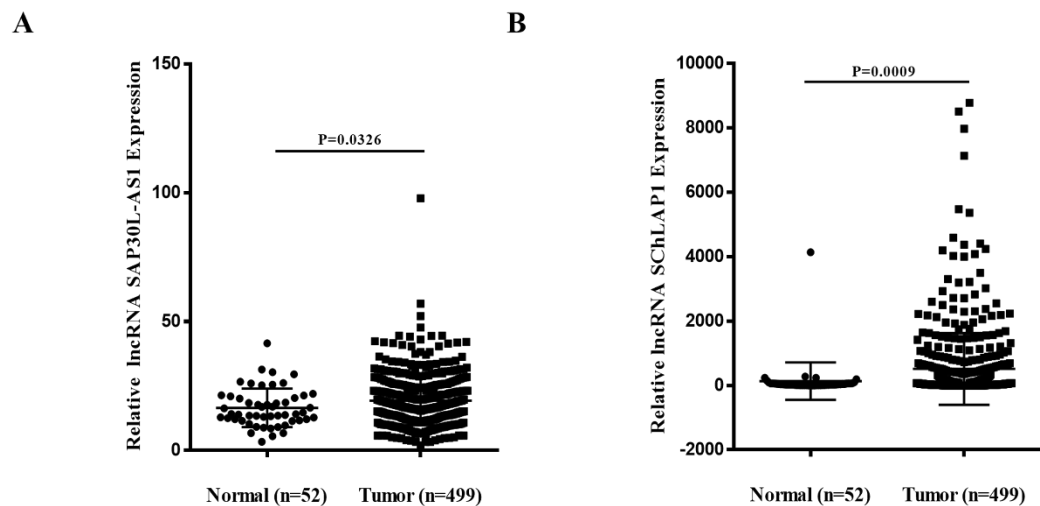

Supplementary Fig. 1

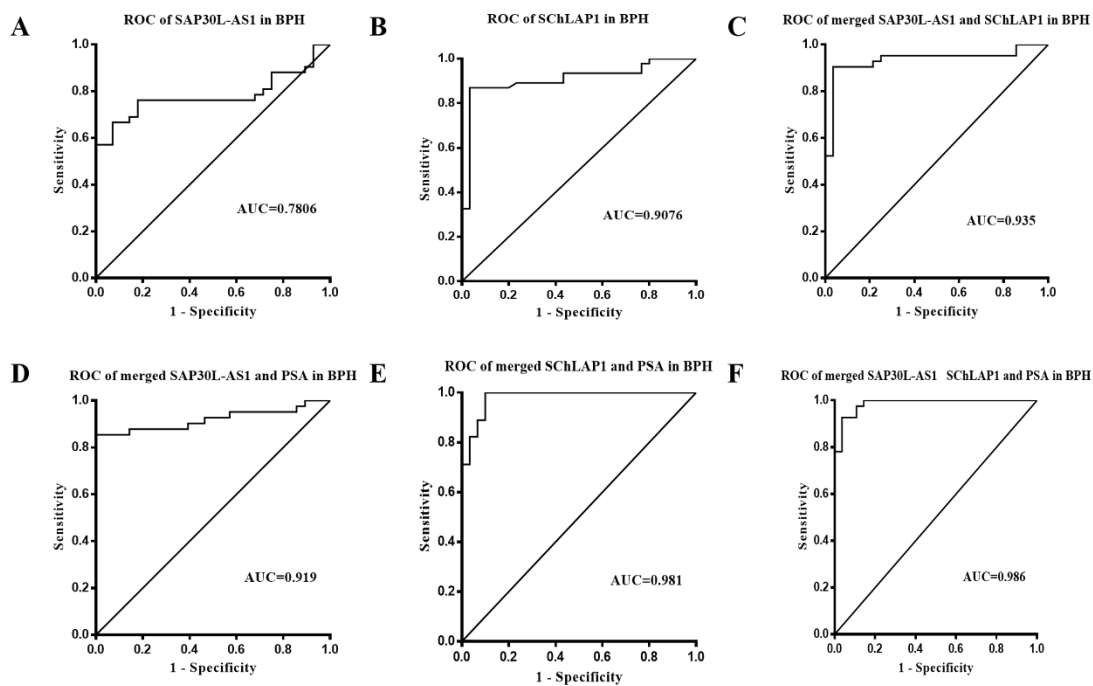

Supplementary Fig. 2
